# Supplementary material
Source: Springer Nature journal article supplement (https://www.springermedizin.de/resource/supplementary/13054_2011_9778_MOESM2_ESM.pdf/9707066)

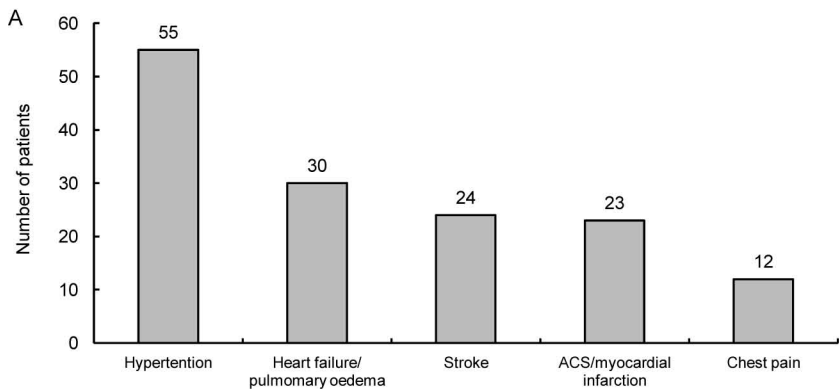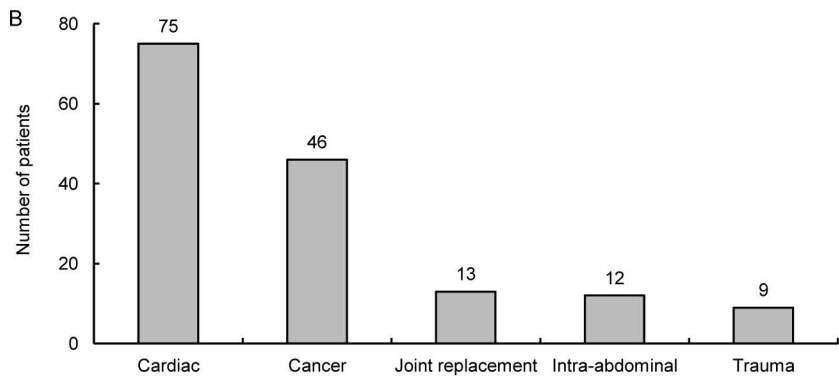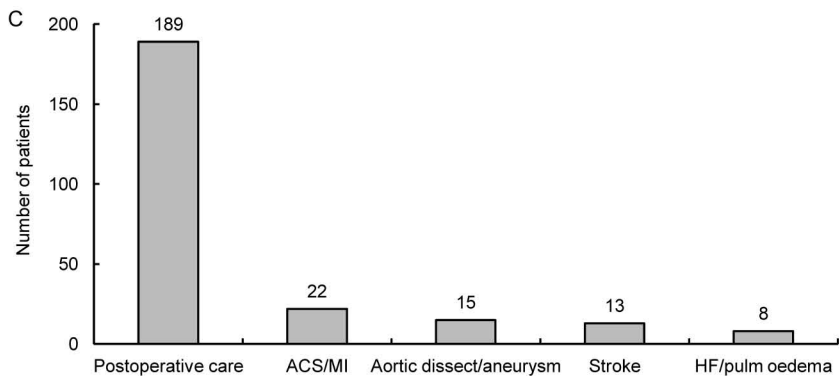

Supplement: MOESM2 [file 9707066]
